# Supplementary material
Source: MDPI journal article supplement (https://www.mdpi.com/2073-4433/15/5/594)
Supplement: s1 [file s1]

# Supplementary Materials: Forecasting the exceedances of PM<sub>2.5</sub> in an urban area

Stavros-Andreas Logothetis <sup>1</sup>, Georgios Kosmopoulos <sup>1</sup>, Orestis Panagopoulos <sup>1</sup> Vasileios Salamalikis <sup>2</sup> and Andreas Kazantzidis <sup>1\*</sup>

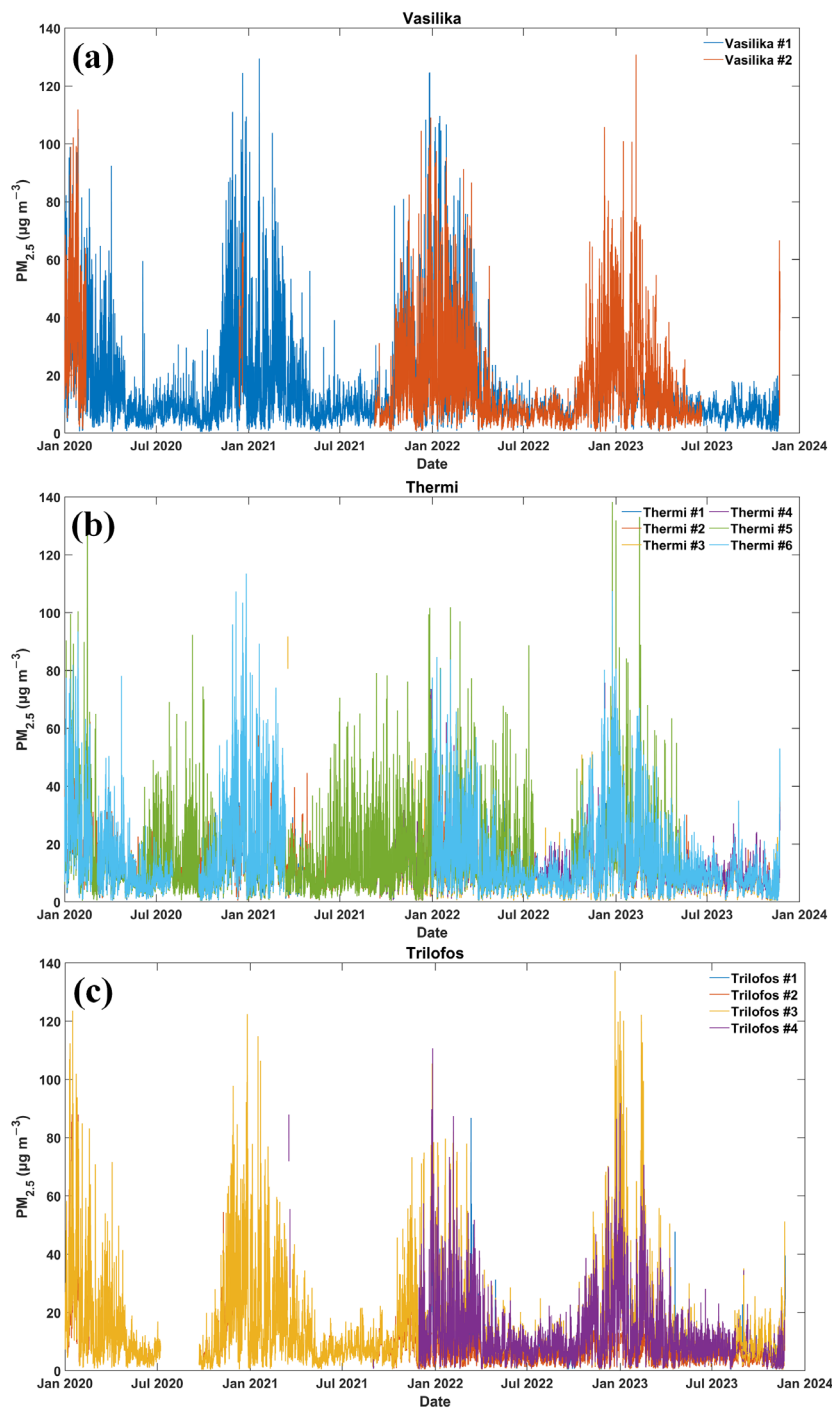

**Figure S1.** Hourly timeseries of PM<sub>2.5</sub> concentration at the station in (a) Vasilika, (b) Thermi, and (c) Trilofos. .

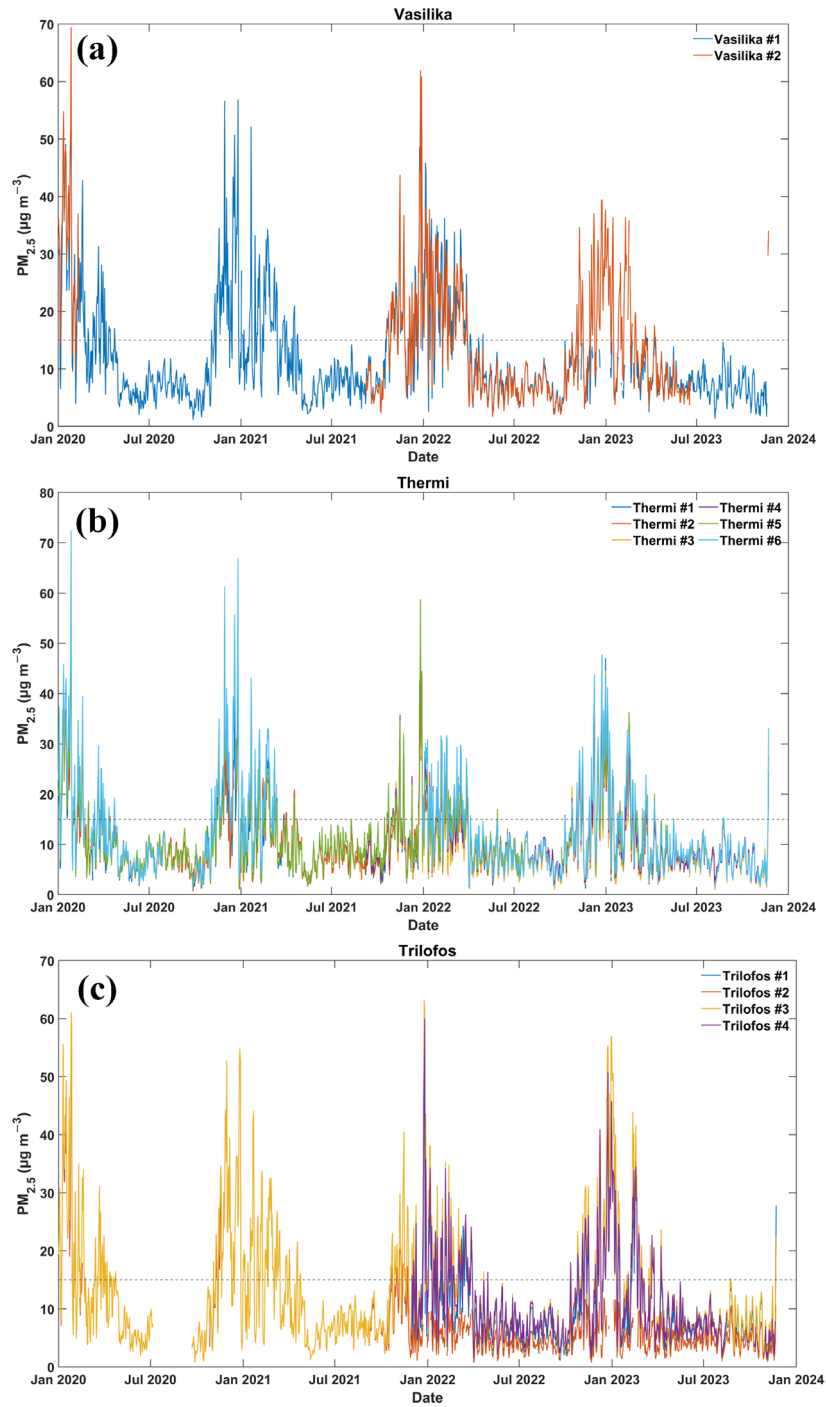

**Figure S2.** Daily timeseries of PM<sub>2.5</sub> concentration at the station in (a) Vasilika, (b) Thermi, and (c) Trilofos.

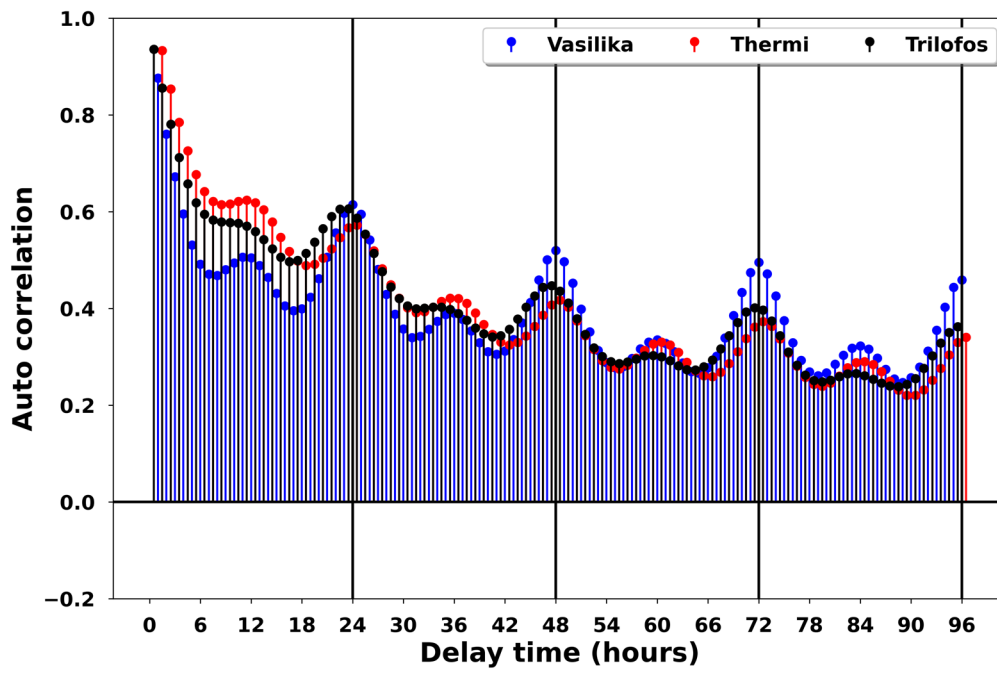

Figure S3. Autocorrelation coefficient of PM<sub>2.5</sub> observations on different delay times. .

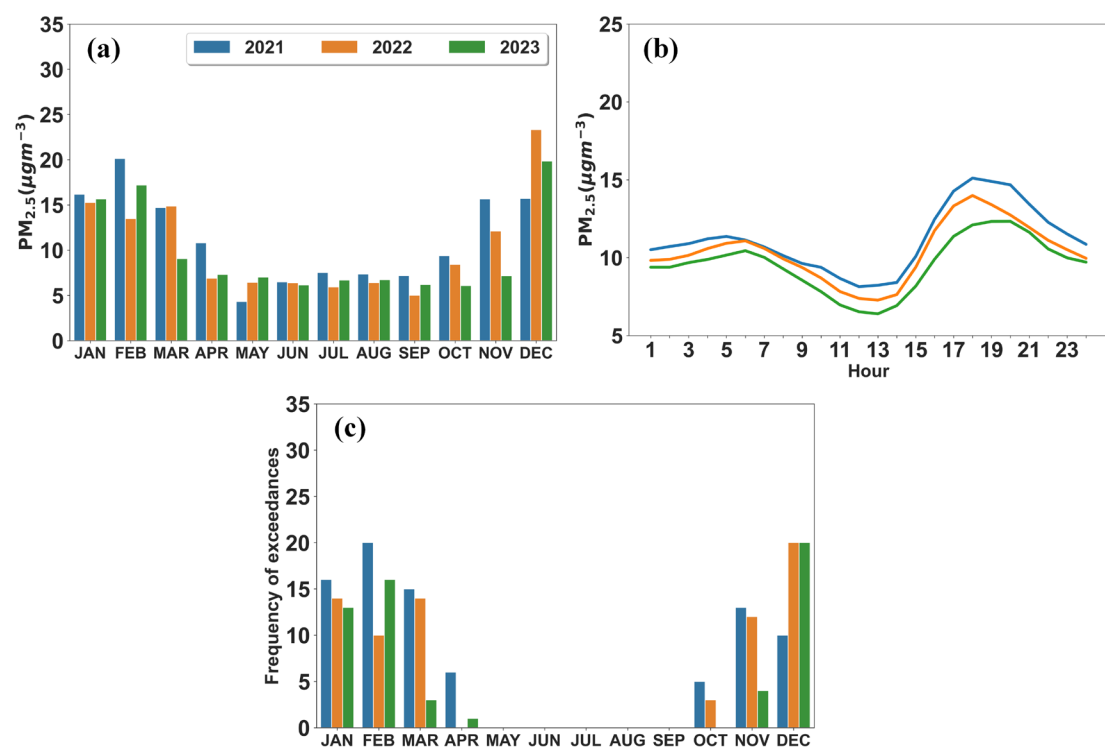

Figure S4. Same as Fig. 5 for Trilofos. .

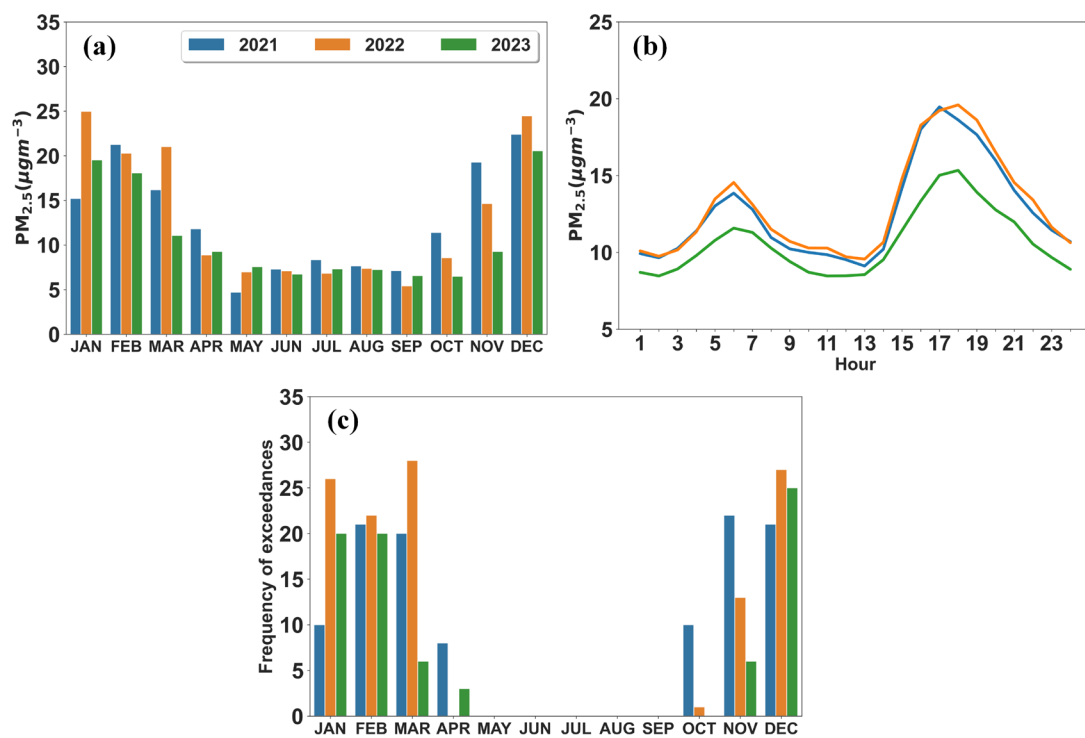

Figure S5. Same as Fig. 5 for Vasilika. .

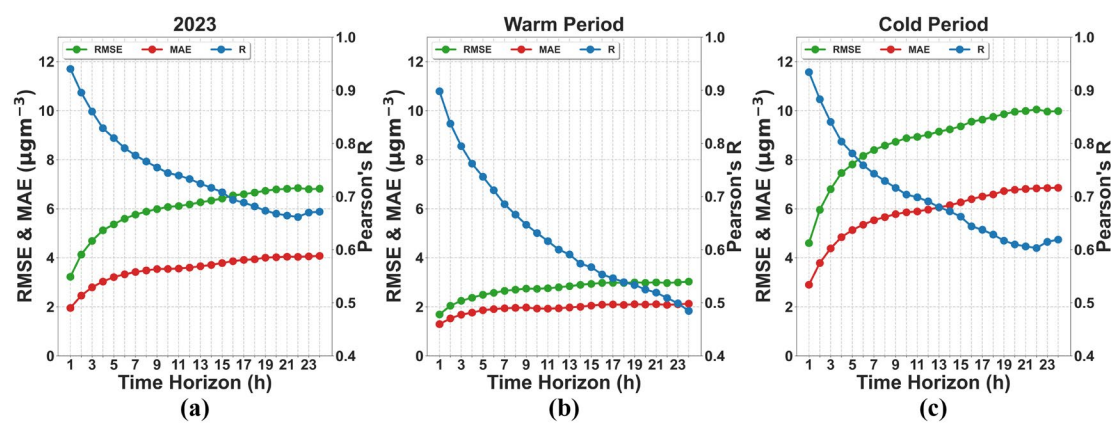

Figure S6. Same as Fig. 7 for Trilofos.

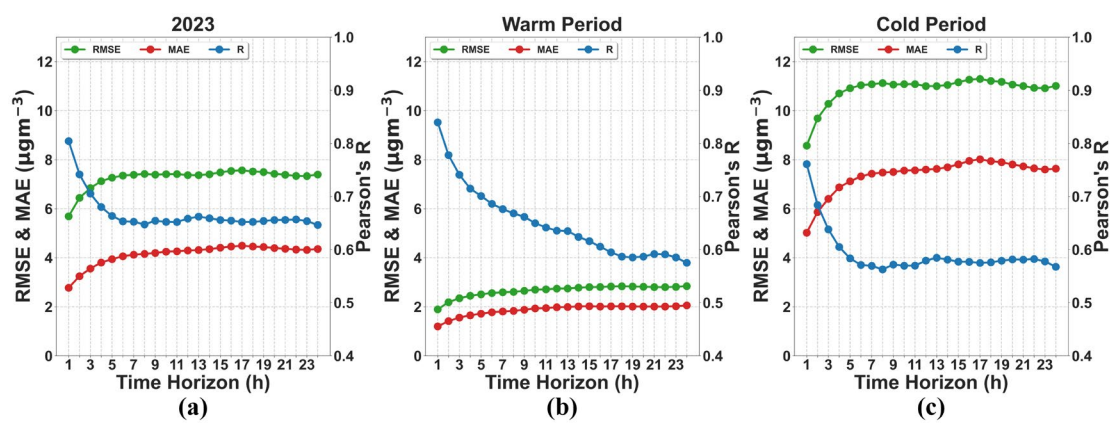

Figure S7. Same as Fig. 7 for Vasilika.

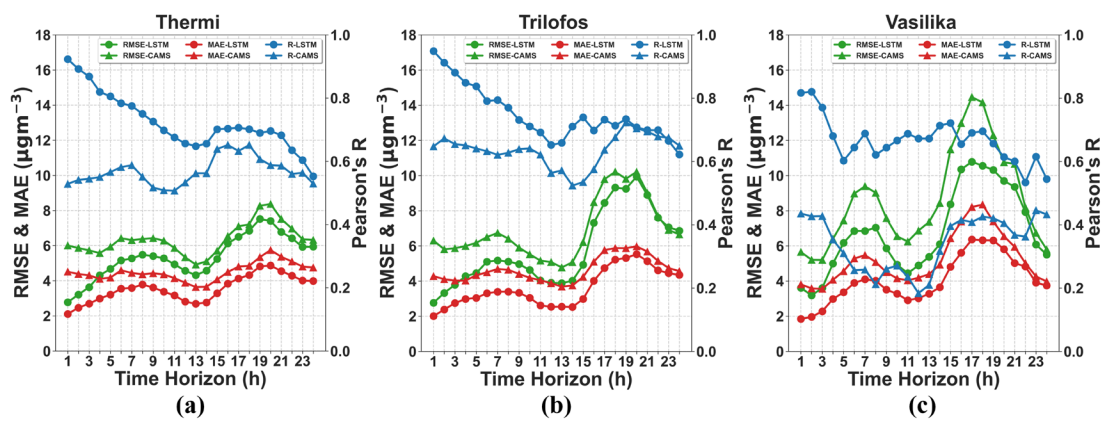

Figure S8. LSTM and CAMS evaluation metrics, MAE, RMSE ( $\mu\text{g m}^{-3}$ ), and R, for Thermi, during 2023 taking into account the 24-hour forecasts at 00 UTC.



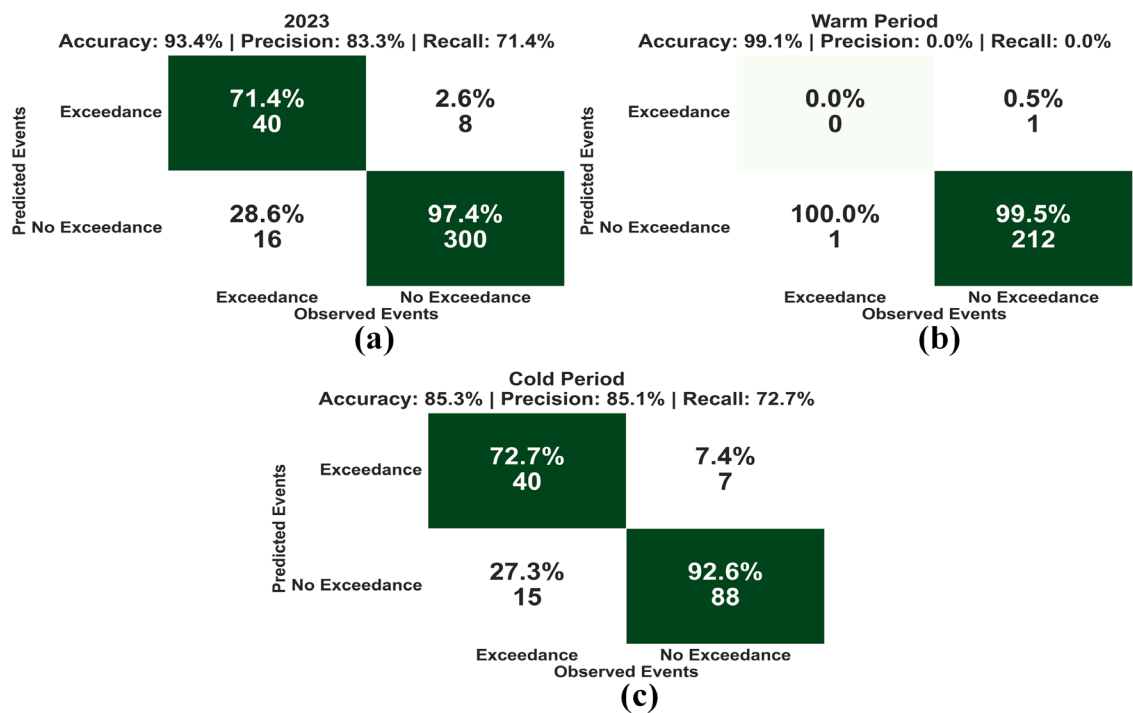

**Figure S9.** Same as Fig. 9 for Trilofos.

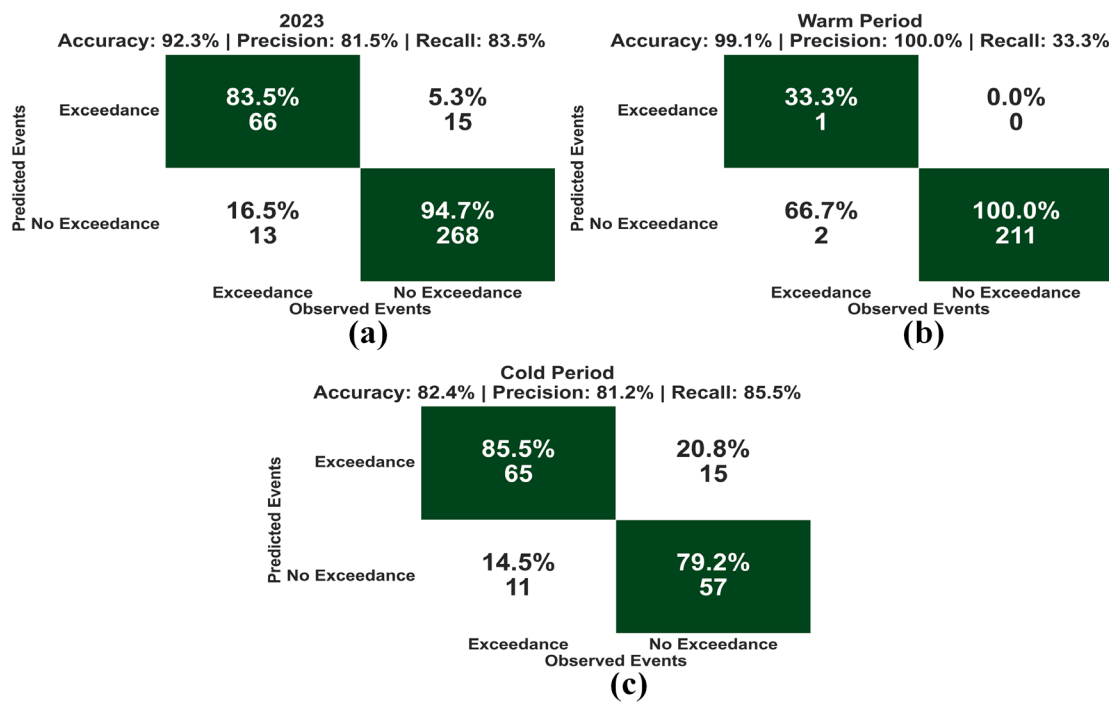

**Figure S10.** Same as Fig. 9 for Vasilika.

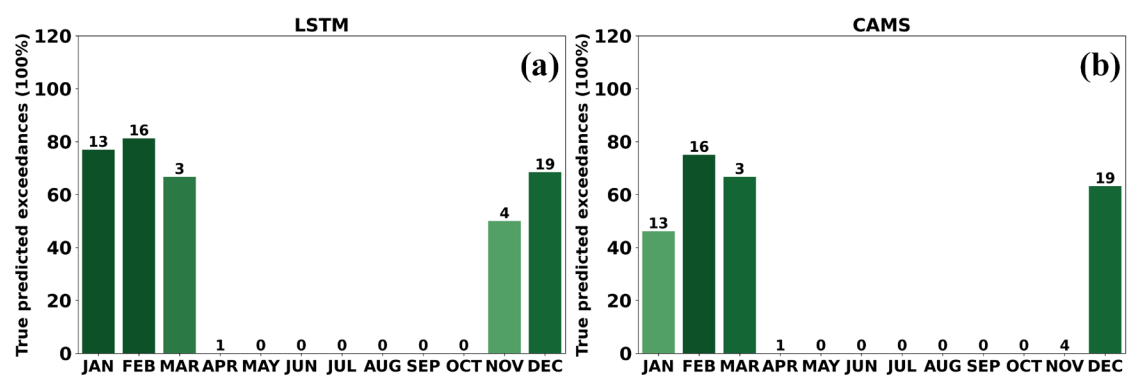

Figure S11. Same as Fig. 10 for Trilofos.

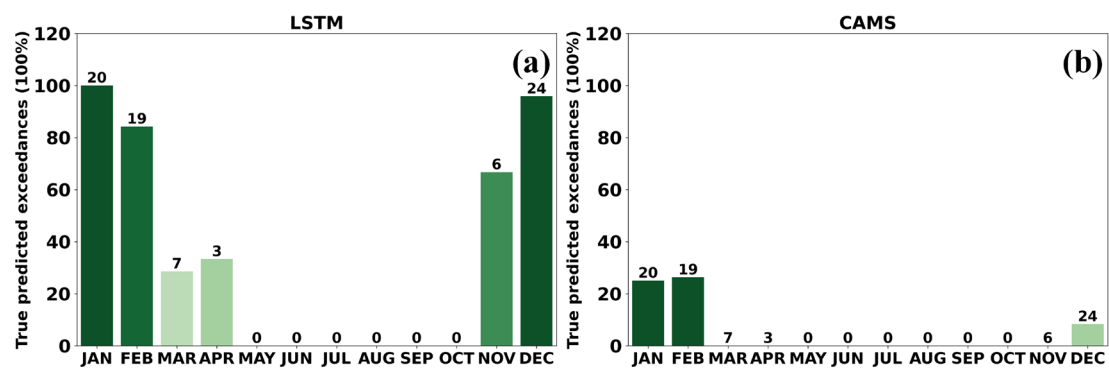

Figure S12. Same as Fig. 10 for Vasilika.

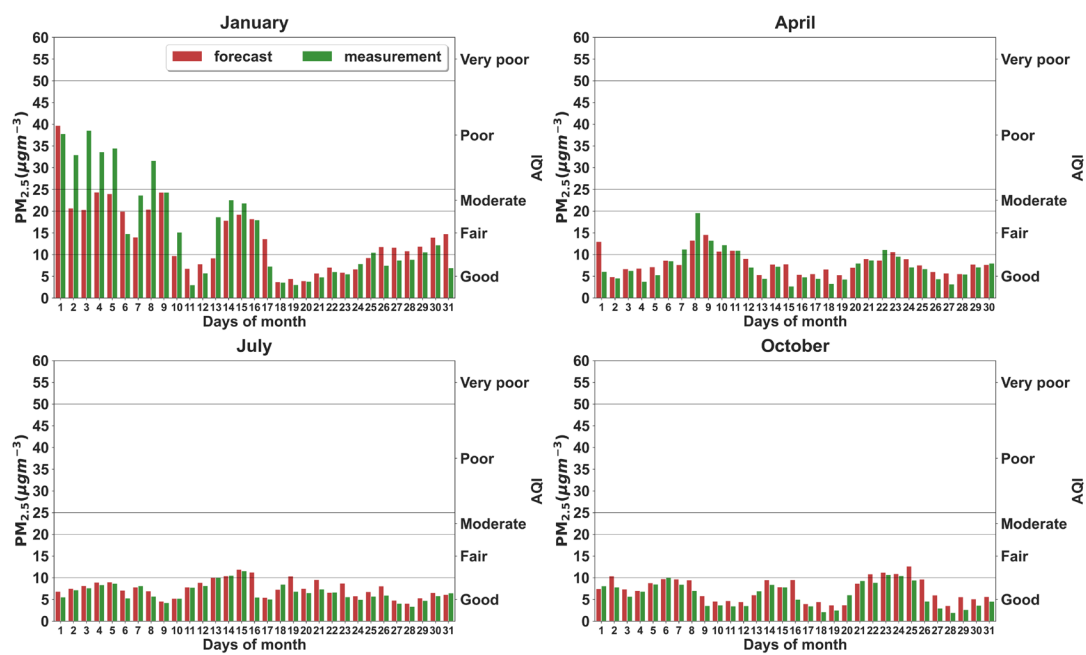

Figure S13. Same as Fig. 11 for Trilofos.

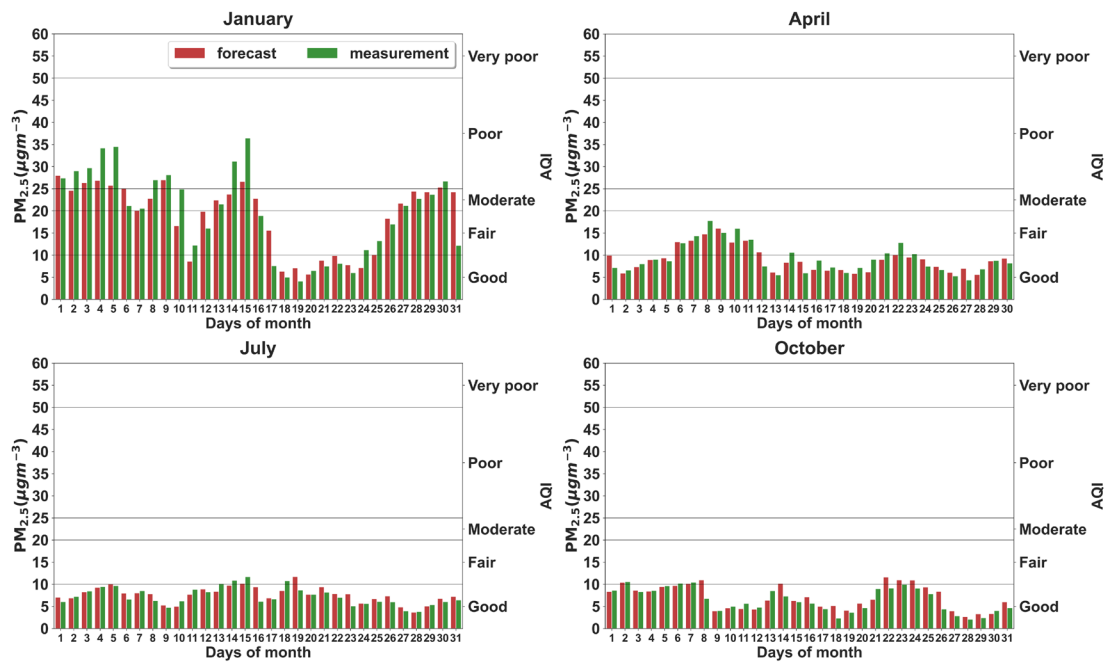

**Figure S14.** Same as Fig. 11 for Vasilika.

**Table S1.** Average PM<sub>2.5</sub> concentrations ( $\pm$  standard deviation) during winter, spring, summer and autumn in the 12 examined sites in Thermi. The averaged values have been calculated from the daily data. .

| Site        | Region   | PM <sub>2.5</sub> ( $\mu\text{g m}^{-3}$ ) |                |               |                |
|-------------|----------|--------------------------------------------|----------------|---------------|----------------|
|             |          | Winter                                     | Spring         | Summer        | Autumn         |
| Thermi #1   | Thermi   | 17.1 $\pm$ 10.7                            | 9.0 $\pm$ 4.5  | 6.7 $\pm$ 2.4 | 9.1 $\pm$ 6.6  |
| Thermi #2   | Thermi   | 15.9 $\pm$ 9.0                             | 9.2 $\pm$ 4.6  | 7.3 $\pm$ 2.2 | 8.8 $\pm$ 5.9  |
| Thermi #3   | Thermi   | 15.6 $\pm$ 10.3                            | 8.9 $\pm$ 4.6  | 6.9 $\pm$ 2.3 | 8.5 $\pm$ 6.2  |
| Thermi #4   | Thermi   | 16.7 $\pm$ 9.6                             | 9.1 $\pm$ 4.3  | 7.8 $\pm$ 2.4 | 9.3 $\pm$ 5.6  |
| Thermi #5   | Thermi   | 17 $\pm$ 10.1                              | 9.6 $\pm$ 4.7  | 8.1 $\pm$ 2.5 | 10.5 $\pm$ 6   |
| Thermi #6   | Thermi   | 21.1 $\pm$ 11                              | 11.1 $\pm$ 5.7 | 7.4 $\pm$ 2.5 | 9.3 $\pm$ 7.3  |
| Vasilika #1 | Vasilika | 20.9 $\pm$ 12.2                            | 11.1 $\pm$ 6.2 | 7.2 $\pm$ 2.2 | 9.4 $\pm$ 7.0  |
| Vasilika #2 | Vasilika | 23.9 $\pm$ 11.3                            | 10.5 $\pm$ 5.9 | 6.7 $\pm$ 2.0 | 11.4 $\pm$ 7.9 |
| Trilofos #1 | Trilofos | 13.2 $\pm$ 8.6                             | 9.0 $\pm$ 5.0  | 6.7 $\pm$ 2.4 | 7.3 $\pm$ 5.0  |
| Trilofos #2 | Trilofos | 8.7 $\pm$ 9.6                              | 4.7 $\pm$ 2.1  | 4.4 $\pm$ 1.6 | 6.4 $\pm$ 4.6  |
| Trilofos #3 | Trilofos | 21.4 $\pm$ 13.1                            | 10.1 $\pm$ 5.5 | 7.1 $\pm$ 2.4 | 10.5 $\pm$ 8.1 |
| Trilofos #4 | Trilofos | 17.9 $\pm$ 10.4                            | 10.1 $\pm$ 5.1 | 7.1 $\pm$ 2.0 | 8.3 $\pm$ 5.8  |

**Table S2.** LSTM configuration. .

| Hyperparameter                            | Value        |
|-------------------------------------------|--------------|
| Input time step                           | 24h          |
| Input feature dimensions                  | 7            |
| Epoch                                     | 50           |
| Nodes                                     | 50 per layer |
| Layers                                    | 2            |
| Batch size                                | 72           |
| Optimizer                                 | Adam         |
| Loss function                             | MAE          |
| Dropout                                   | 0.2          |
| LSTM activation function                  | tanh         |
| Fully Connected Layer activation function | linear       |
